# Supplementary material for: Oral Health-Related Quality of Life in Patients after Stroke—A Systematic Review
Source: MDPI journal article supplement (doi:10.3390/jcm11051415), 2022-03-04
Supplement: s1 [file s1]

**Table S1.** Excluded full-text articles screened for eligibility with reason for exclusion.

| Author and Year         | Reason for Exclusion                     |
|-------------------------|------------------------------------------|
| Zhu et al. 2008         | No explicit reporting of stroke patients |
| Molania et al. 2021     | No explicit reporting of stroke patients |
| Pengpid et al. 2021     | No explicit reporting of stroke patients |
| Parat et al. 2020       | No explicit reporting of stroke patients |
| de Bataille et al. 2021 | No explicit reporting of stroke patients |
| Montero et al. 2021     | No explicit reporting of stroke patients |
| Vasiliu et al. 2019     | No explicit reporting of stroke patients |
| Fan et al. 2019         | No explicit reporting of stroke patients |

OHRQoL: oral health-related quality of life.

#### Supplementary Table S1 References

- S1. Zhu HW, McGrath C, McMillan AS, Li LS. Can caregivers be used in assessing oral health-related quality of life among patients hospitalized for acute medical conditions? *Community Dent Oral Epidemiol.* 2008 Feb;36(1):27-33. doi: 10.1111/j.1600-0528.2006.00370.x. PMID: 18205637.
- S2. Molania T, Malekzadeh Shafaroudi A, Taghavi M, Ehsani H, Moosazadeh M, Haddadi A, Gholizadeh N, Salehi M. Oral health-related quality of life (OHRQoL) in cardiovascular patients referring to Fatima Zahra Hospital in Sari, Iran. *BMC Oral Health.* 2021 Aug 11;21(1):391. doi: 10.1186/s12903-021-01756-0. PMID: 34380490; PMCID: PMC8356446.
- S3. Pengpid S, Peltzer K. Prevalence and Associated Factors of Self-rated Oral Health among a National Population-based Sample of Adults in Sudan: Results of the 2016 STEPS Survey. *Oral Health Prev Dent.* 2021 Jan 7;19(1):391-397. doi: 10.3290/j.ohpd.b1749751. PMID: 34259432.
- S4. Parat K, Radić M, Perković D, Lukenda DB, Kaliterna DM. Reduced salivary flow and caries status are correlated with disease activity and severity in patients with diffuse cutaneous systemic sclerosis. *J Int Med Res.* 2020 Oct;48(10):300060520941375. doi: 10.1177/0300060520941375. PMID: 33081544; PMCID: PMC7588767.
- S5. de Bataille C, Castellan M, Massabeau C, Jouve E, Lacaze JL, Sibaud V, Vigarios E. Oral mucosal changes induced by adjuvant endocrine therapies in breast cancer patients: clinical aspects and proposal for management. *Support Care Cancer.* 2021 Apr;29(4):1719-1722. doi: 10.1007/s00520-020-05797-z. Epub 2020 Nov 2. PMID: 33140247.
- S6. Montero J, Dib A, Guadilla Y, Flores J, Pardal-Peláez B, Quispe-López N, Gómez-Polo C. Functional and Patient-Centered Treatment Outcomes with Mandibular Overdentures Retained by Two Immediate or Conventionally Loaded Implants: A Randomized Clinical Trial. *J Clin Med.* 2021 Aug 6;10(16):3477. doi: 10.3390/jcm10163477. PMID: 34441773; PMCID: PMC8396916.
- S7. Vasiliu MP, Sachelarie L, Popovici D, Farcas DM. Oral Health-Related Quality of Life in the Case of Elderly People from Romania Before and After the Prosthetic Treatment. *Int J Med Res Health Sci* 2019;8:33-39
- S8. Fan WY, Tiang N, Broadbent JM, Thomson WM. Occurrence, Associations, and Impacts of Nocturnal Parafunction, Daytime Parafunction, and Temporomandibular Symptoms in 38-Year-Old Individuals. *J Oral Facial Pain Headache.* 2019 Summer;33(3):254-259. doi: 10.11607/ofph.2221. Epub 2018 Oct 26. PMID: 30371683.
